# Supplementary material
Source: MDPI journal article supplement (https://www.mdpi.com/2071-1050/13/22/12554)
Supplement: s1 [file s1]

## SUPPLEMENTARY MATERIAL - 1

### Tables S1. Frequency results considering the argument categories and gender

**Table S1-1.** Number (N<sub>a</sub>) and percentage (%) of the main argument categories and subcategories used by pupils in SCENARIO 1 for schemes A and B, according to GENDER (Girl/Boy/NR: Non-response). The categories are presented in descending order of frequency observed for the three scenarios, with the Don't Know category presented last. (Reprod. capacity: Reproduction capacity; Intersp. interact.: Interspecific interaction; General conserv.: General conservation; Sat. human int.: Satisfaction of human interest).

| CATEGORY<br>Subcategory | Scheme A       |      |                |      |                |      |                |      | Scheme B       |      |                |      |                |      |                |      | TOTAL          |      |
|-------------------------|----------------|------|----------------|------|----------------|------|----------------|------|----------------|------|----------------|------|----------------|------|----------------|------|----------------|------|
|                         | All            |      | Girl           |      | Boy            |      | NR             |      | All            |      | Girl           |      | Boy            |      | NR             |      |                |      |
|                         | N <sub>a</sub> | %    |
| DIVERSITY               |                |      |                |      |                |      |                |      |                |      |                |      |                |      |                |      |                |      |
| Abundance               | 53             | 5.9  | 26             | 5.1  | 27             | 7.5  | 0              | 0.0  | 59             | 33.5 | 40             | 37.0 | 17             | 29.8 | 2              | 18.2 | 112            | 10.4 |
| Diversity value         | 167            | 18.5 | 100            | 19.8 | 61             | 17.0 | 6              | 15.4 | 11             | 6.3  | 7              | 6.5  | 4              | 7.0  | 0              | 0.0  | 178            | 16.5 |
| Evenness                | 408            | 45.2 | 239            | 47.3 | 158            | 44.0 | 11             | 28.2 | 6              | 3.4  | 3              | 2.8  | 3              | 5.3  | 0              | 0.0  | 414            | 38.4 |
| Richness                | 37             | 4.1  | 20             | 4.0  | 15             | 4.2  | 2              | 5.1  | 10             | 5.7  | 8              | 7.4  | 2              | 3.5  | 0              | 0.0  | 47             | 4.4  |
| ECOLOGICAL DYNAMICS     |                |      |                |      |                |      |                |      |                |      |                |      |                |      |                |      |                |      |
| Reprod. capacity        | 18             | 2.0  | 11             | 2.2  | 7              | 1.9  | 0              | 0.0  | 2              | 1.1  | 1              | 0.9  | 0              | 0.0  | 1              | 9.1  | 20             | 1.9  |
| Trophic structure       | 15             | 1.7  | 11             | 2.2  | 3              | 0.8  | 1              | 2.6  | 20             | 11.4 | 10             | 9.3  | 7              | 12.3 | 3              | 27.3 | 35             | 3.2  |
| Spatial interaction     | 14             | 1.6  | 7              | 1.4  | 4              | 1.1  | 3              | 7.7  | 1              | 0.6  | 1              | 0.9  | 0              | 0.0  | 0              | 0.0  | 15             | 1.4  |
| Naturalness             | 9              | 1.0  | 5              | 1.0  | 4              | 1.1  | 0              | 0.0  | 6              | 3.4  | 2              | 1.9  | 4              | 7.0  | 0              | 0.0  | 15             | 1.4  |
| Intersp. interact.      | 19             | 2.0  | 10             | 2.0  | 7              | 2.0  | 1              | 2.6  | 4              | 2.3  | 3              | 2.8  | 1              | 1.8  | 0              | 0.0  | 22             | 2.1  |
| CONSERVATION            |                |      |                |      |                |      |                |      |                |      |                |      |                |      |                |      |                |      |
| General conserv.        | 9              | 1.0  | 4              | 0.8  | 4              | 1.1  | 1              | 2.6  | 2              | 1.1  | 1              | 0.9  | 0              | 0.0  | 1              | 9.1  | 11             | 1.0  |
| Extinction risk         | 41             | 4.5  | 24             | 4.8  | 16             | 4.5  | 1              | 2.6  | 4              | 2.3  | 4              | 3.7  | 0              | 0.0  | 0              | 0.0  | 45             | 4.2  |
| AUTHORITARIANISM        |                |      |                |      |                |      |                |      |                |      |                |      |                |      |                |      |                |      |
| Authoritarianism        | 26             | 2.9  | 12             | 2.4  | 13             | 3.6  | 1              | 2.6  | 17             | 9.7  | 9              | 8.3  | 6              | 10.5 | 2              | 18.2 | 43             | 4.0  |
| EVOLUTION               |                |      |                |      |                |      |                |      |                |      |                |      |                |      |                |      |                |      |
| Speciation              | 5              | 0.6  | 3              | 0.6  | 2              | 0.6  | 0              | 0.0  | 1              | 0.6  | 0              | 0.0  | 1              | 1.8  | 0              | 0.0  | 6              | 0.6  |
| AESTHETICS              |                |      |                |      |                |      |                |      |                |      |                |      |                |      |                |      |                |      |
| Aesthetics              | 25             | 2.8  | 10             | 2.0  | 10             | 2.8  | 5              | 12.8 | 6              | 3.4  | 3              | 2.8  | 3              | 5.3  | 0              | 0.0  | 31             | 2.9  |
| SOCIAL DYNAMICS         |                |      |                |      |                |      |                |      |                |      |                |      |                |      |                |      |                |      |
| Sat. human int.         | 5              | 0.6  | 2              | 0.4  | 3              | 0.8  | 0              | 0.0  | 8              | 4.5  | 4              | 3.7  | 4              | 7.0  | 0              | 0.0  | 13             | 1.2  |
| ETHICS                  |                |      |                |      |                |      |                |      |                |      |                |      |                |      |                |      |                |      |
| Ethics                  | 12             | 1.3  | 9              | 1.8  | 3              | 0.8  | 0              | 0.0  | 0              | 0.0  | 0              | 0.0  | 0              | 0.0  | 0              | 0.0  | 12             | 1.1  |
| EGOCENTRISM             |                |      |                |      |                |      |                |      |                |      |                |      |                |      |                |      |                |      |
| Egocentrism             | 6              | 0.7  | 3              | 0.6  | 1              | 0.3  | 2              | 5.1  | 3              | 1.7  | 3              | 2.8  | 0              | 0.0  | 0              | 0.0  | 9              | 0.8  |
| DON'T KNOW              |                |      |                |      |                |      |                |      |                |      |                |      |                |      |                |      |                |      |
| Don't know              | 35             | 3.9  | 9              | 1.8  | 21             | 5.8  | 5              | 12.8 | 16             | 9.1  | 9              | 8.3  | 5              | 8.8  | 2              | 18.2 | 51             | 4.7  |
| TOTAL                   | 903            | 100  | 505            | 100  | 359            | 100  | 39             | 100  | 176            | 100  | 108            | 100  | 57             | 100  | 11             | 100  | 1079           | 100  |

**Table S1-2.** Number (N<sub>a</sub>) and percentage (%) of the main argument categories and subcategories used by pupils in SCENARIO 2 for schemes C and D, according to GENDER (Girl/Boy/NR: Non-response). The categories are presented in descending order of frequency observed for the three scenarios, with the DK (Don't Know) category presented last. (Reprod. capac.: Reproduction capacity; Intersp. interact.: Interspecific interaction; General conserv.: General conservation; Sp. introd. threats: Species introduction threats; Sat. human int.: Satisfaction of human interest).

| CATEGORY<br>Subcategory | Scheme C       |      |                |      |                |      |                |      | Scheme D       |      |                |      |                |      |                |      | TOTAL          |      |
|-------------------------|----------------|------|----------------|------|----------------|------|----------------|------|----------------|------|----------------|------|----------------|------|----------------|------|----------------|------|
|                         | All            |      | Girl           |      | Boy            |      | NR             |      | All            |      | Girl           |      | Boy            |      | NR             |      |                |      |
|                         | N <sub>a</sub> | %    |
| DIVERSITY               |                |      |                |      |                |      |                |      |                |      |                |      |                |      |                |      |                |      |
| Abundance               | 17             | 2.4  | 11             | 2.7  | 5              | 2.0  | 1              | 3.7  | 22             | 11.9 | 14             | 16.7 | 8              | 8.8  | 0              | 0.0  | 39             | 4.4  |
| Diversity value         | 201            | 28.9 | 121            | 29.2 | 73             | 28.7 | 7              | 25.9 | 13             | 7.0  | 7              | 8.3  | 5              | 5.5  | 1              | 10.0 | 214            | 24.3 |
| Evenness                | 43             | 6.2  | 17             | 4.1  | 26             | 10.2 | 0              | 0.0  | 38             | 20.5 | 20             | 23.8 | 18             | 19.8 | 0              | 0.0  | 81             | 9.2  |
| Richness                | 291            | 41.8 | 186            | 44.8 | 97             | 38.2 | 8              | 29.6 | 20             | 10.8 | 8              | 9.5  | 11             | 12.1 | 1              | 10.0 | 311            | 35.3 |
| ECOLOGICAL DYNAMICS     |                |      |                |      |                |      |                |      |                |      |                |      |                |      |                |      |                |      |
| Reprod. capacity        | 6              | 0.9  | 6              | 1.4  | 0              | 0.0  | 0              | 0.0  | 5              | 2.7  | 1              | 1.2  | 4              | 4.4  | 0              | 0.0  | 11             | 1.2  |
| Trophic structure       | 7              | 1.0  | 5              | 1.2  | 2              | 0.8  | 0              | 0.0  | 3              | 1.6  | 3              | 3.6  | 0              | 0.0  | 0              | 0.0  | 10             | 1.1  |
| Spatial interaction     | 2              | 0.3  | 1              | 0.2  | 1              | 0.4  | 0              | 0.0  | 3              | 1.6  | 2              | 2.4  | 1              | 1.1  | 0              | 0.0  | 5              | 0.6  |
| Naturalness             | 7              | 1.0  | 6              | 1.4  | 1              | 0.4  | 0              | 0.0  | 4              | 2.2  | 2              | 2.4  | 2              | 2.2  | 0              | 0.0  | 11             | 1.2  |
| Intersp. interaction    | 3              | 0.4  | 1              | 0.2  | 2              | 0.8  | 0              | 0.0  | 3              | 1.6  | 1              | 1.2  | 2              | 2.2  | 0              | 0.0  | 6              | 0.7  |
| CONSERVATION            |                |      |                |      |                |      |                |      |                |      |                |      |                |      |                |      |                |      |
| General conserv.        | 3              | 0.4  | 2              | 0.5  | 0              | 0.0  | 1              | 3.7  | 0              | 0.0  | 0              | 0.0  | 0              | 0.0  | 0              | 0.0  | 3              | 0.3  |
| Sp. introd. threats     | 0              | 0.0  | 0              | 0.0  | 0              | 0.0  | 0              | 0.0  | 2              | 1.1  | 1              | 1.2  | 1              | 1.1  | 0              | 0.0  | 2              | 0.2  |
| Extinction risk         | 12             | 1.7  | 7              | 1.7  | 4              | 1.6  | 1              | 3.7  | 7              | 3.8  | 5              | 6.0  | 2              | 2.2  | 0              | 0.0  | 19             | 2.2  |
| AUTHORITARIANISM        |                |      |                |      |                |      |                |      |                |      |                |      |                |      |                |      |                |      |
| Authoritarianism        | 28             | 4.0  | 14             | 3.4  | 10             | 3.9  | 4              | 14.8 | 23             | 12.4 | 9              | 10.7 | 13             | 14.3 | 1              | 10.0 | 51             | 5.8  |
| EVOLUTION               |                |      |                |      |                |      |                |      |                |      |                |      |                |      |                |      |                |      |
| Speciation              | 9              | 1.3  | 6              | 1.4  | 3              | 1.2  | 0              | 0.0  | 4              | 2.2  | 1              | 1.2  | 3              | 3.3  | 0              | 0.0  | 13             | 1.5  |
| AESTHETICS              |                |      |                |      |                |      |                |      |                |      |                |      |                |      |                |      |                |      |
| Aesthetics              | 15             | 2.2  | 6              | 1.4  | 7              | 2.8  | 2              | 7.4  | 13             | 7.0  | 0              | 0.0  | 10             | 11.0 | 3              | 30.0 | 28             | 3.2  |
| SOCIAL DYNAMICS         |                |      |                |      |                |      |                |      |                |      |                |      |                |      |                |      |                |      |
| Sat. human int.         | 8              | 1.1  | 6              | 1.4  | 2              | 0.8  | 0              | 0.0  | 2              | 1.1  | 1              | 1.2  | 0              | 0.0  | 1              | 10.0 | 10             | 1.1  |
| ETHICS                  |                |      |                |      |                |      |                |      |                |      |                |      |                |      |                |      |                |      |
| Ethics                  | 2              | 0.3  | 1              | 0.2  | 1              | 0.4  | 0              | 0.0  | 1              | 0.5  | 1              | 1.2  | 0              | 0.0  | 0              | 0.0  | 3              | 0.3  |
| EGOCENTRISM             |                |      |                |      |                |      |                |      |                |      |                |      |                |      |                |      |                |      |
| Egocentrism             | 7              | 1.0  | 4              | 1.0  | 3              | 1.2  | 0              | 0.0  | 1              | 0.5  | 1              | 1.2  | 0              | 0.0  | 0              | 0.0  | 8              | 0.9  |
| DON'T KNOW              |                |      |                |      |                |      |                |      |                |      |                |      |                |      |                |      |                |      |
| Don't know              | 35             | 5.0  | 15             | 3.6  | 17             | 6.7  | 3              | 11.1 | 21             | 11.4 | 7              | 8.3  | 11             | 12.1 | 3              | 30.0 | 56             | 6.4  |
| TOTAL                   | 696            | 100  | 415            | 100  | 254            | 100  | 27             | 100  | 185            | 100  | 84             | 100  | 91             | 100  | 10             | 100  | 881            | 100  |

**Table S1-3.** Number (N<sub>a</sub>) and percentage (%) of the main categories and subcategories of arguments used by pupils in SCENARIO 3 for schemes E and F, according to GENDER (Girl/Boy/NR: Non-response). The categories are presented in descending order of frequency observed for the three scenarios, with the DK (Don't Know) category presented last. (Reprod. capacity: Reproduction capacity; Colonization mode-A: Artificial colonization mode; Colonization mode-N: Natural colonization mode; Intersp. interaction: Interspecific interaction; Sp. introd. threats: Species introduction' threats; Adaptation-Orig.: Adaption in original habitat; Adaptation-New: Adaptation to a new habitat; Sat. human int.: Satisfaction of human interest).

| CATEGORY<br>Subcategory | Scheme E       |      |                |      |                |      |                |      | Scheme F       |      |                |      |                |      |                |      | TOTAL          |      |
|-------------------------|----------------|------|----------------|------|----------------|------|----------------|------|----------------|------|----------------|------|----------------|------|----------------|------|----------------|------|
|                         | All            |      | Girl           |      | Boy            |      | NR             |      | All            |      | Girl           |      | Boy            |      | NR             |      |                |      |
|                         | N <sub>a</sub> | %    |
| DIVERSITY               |                |      |                |      |                |      |                |      |                |      |                |      |                |      |                |      |                |      |
| Abundance               | 7              | 1.8  | 5              | 2.2  | 2              | 1.4  | 0              | 0.0  | 13             | 2.3  | 6              | 1.9  | 6              | 2.6  | 1              | 4.3  | 20             | 2.1  |
| Diversity value         | 68             | 17.4 | 37             | 16.2 | 26             | 17.7 | 5              | 33.3 | 14             | 2.4  | 4              | 1.3  | 8              | 3.4  | 2              | 8.7  | 82             | 8.5  |
| Evenness                | 14             | 3.6  | 7              | 3.1  | 7              | 4.8  | 0              | 0.0  | 22             | 3.8  | 9              | 2.8  | 13             | 5.6  | 0              | 0.0  | 36             | 3.7  |
| Richness                | 148            | 37.9 | 89             | 39.0 | 55             | 37.4 | 4              | 26.7 | 30             | 5.2  | 16             | 5.0  | 13             | 5.6  | 1              | 4.3  | 178            | 18.4 |
| ECOLOGICAL DYNAMICS     |                |      |                |      |                |      |                |      |                |      |                |      |                |      |                |      |                |      |
| Reprod. capacity        | 1              | 0.3  | 1              | 0.4  | 0              | 0.0  | 0              | 0.0  | 6              | 1.1  | 3              | 0.9  | 3              | 1.3  | 0              | 0.0  | 7              | 0.7  |
| Colonization mode-A     | 25             | 6.4  | 19             | 8.3  | 6              | 4.1  | 0              | 0.0  | 29             | 5.1  | 20             | 6.3  | 9              | 3.9  | 0              | 0.0  | 54             | 5.6  |
| Colonization mode-N     | 7              | 1.8  | 6              | 2.6  | 1              | 0.7  | 0              | 0.0  | 116            | 20.2 | 77             | 24.1 | 37             | 15.9 | 2              | 8.7  | 123            | 12.7 |
| Trophic structure       | 3              | 0.8  | 2              | 0.9  | 1              | 0.7  | 0              | 0.0  | 5              | 0.9  | 5              | 1.6  | 0              | 0.0  | 0              | 0.0  | 8              | 0.8  |
| Spatial interaction     | 1              | 0.3  | 1              | 0.4  | 0              | 0.0  | 0              | 0.0  | 5              | 0.9  | 3              | 0.9  | 1              | 0.4  | 1              | 4.3  | 6              | 0.6  |
| Naturalness             | 0              | 0.0  | 0              | 0.0  | 0              | 0.0  | 0              | 0.0  | 58             | 10.1 | 37             | 11.6 | 20             | 8.6  | 1              | 4.3  | 58             | 6.0  |
| Intersp. interaction    | 0              | 0.0  | 0              | 0.0  | 0              | 0.0  | 0              | 0.0  | 9              | 1.6  | 6              | 1.9  | 3              | 1.3  | 0              | 0.0  | 9              | 0.9  |
| CONSERVATION            |                |      |                |      |                |      |                |      |                |      |                |      |                |      |                |      |                |      |
| General conservation    | 2              | 0.5  | 2              | 0.9  | 0              | 0.0  | 0              | 0.0  | 12             | 2.1  | 4              | 1.3  | 7              | 3.0  | 1              | 4.3  | 14             | 1.5  |
| Ethnocentrism           | 2              | 0.5  | 2              | 0.9  | 0              | 0.0  | 0              | 0.0  | 32             | 5.6  | 15             | 4.7  | 17             | 7.3  | 0              | 0.0  | 34             | 3.5  |
| Sp. introd. threats     | 3              | 0.8  | 3              | 1.3  | 0              | 0.0  | 0              | 0.0  | 68             | 11.8 | 39             | 12.2 | 27             | 11.6 | 2              | 8.7  | 71             | 7.4  |
| Extinction risk         | 6              | 1.5  | 3              | 1.3  | 3              | 2.0  | 0              | 0.0  | 17             | 3.0  | 12             | 3.8  | 4              | 1.7  | 1              | 4.3  | 23             | 2.4  |
| AUTHORITARIANISM        |                |      |                |      |                |      |                |      |                |      |                |      |                |      |                |      |                |      |
| Authoritarianism        | 24             | 6.2  | 9              | 3.9  | 13             | 8.8  | 2              | 13.3 | 26             | 4.5  | 9              | 2.8  | 15             | 6.4  | 2              | 8.7  | 50             | 5.2  |
| EVOLUTION               |                |      |                |      |                |      |                |      |                |      |                |      |                |      |                |      |                |      |
| Adaptation-Orig.        | 0              | 0.0  | 0              | 0.0  | 0              | 0.0  | 0              | 0.0  | 29             | 5.0  | 15             | 4.7  | 12             | 5.2  | 2              | 8.7  | 29             | 3.0  |
| Adaptation-New          | 4              | 1.0  | 3              | 1.3  | 1              | 0.7  | 0              | 0.0  | 22             | 3.8  | 16             | 5.0  | 6              | 2.6  | 0              | 0.0  | 26             | 2.7  |
| Speciation              | 3              | 0.8  | 2              | 0.9  | 1              | 0.7  | 0              | 0.0  | 8              | 9.4  | 4              | 1.2  | 4              | 1.7  | 0              | 0.0  | 11             | 1.1  |
| AESTHETICS              |                |      |                |      |                |      |                |      |                |      |                |      |                |      |                |      |                |      |
| Aesthetics              | 13             | 3.3  | 6              | 2.6  | 4              | 2.7  | 3              | 20.0 | 9              | 1.6  | 0              | 0.0  | 6              | 2.6  | 3              | 13.0 | 22             | 2.3  |
| SOCIAL DYNAMICS         |                |      |                |      |                |      |                |      |                |      |                |      |                |      |                |      |                |      |
| Sat. human int.         | 13             | 3.3  | 8              | 3.5  | 5              | 3.4  | 0              | 0.0  | 7              | 1.2  | 4              | 1.3  | 2              | 0.9  | 1              | 4.3  | 20             | 2.1  |
| ETHICS                  |                |      |                |      |                |      |                |      |                |      |                |      |                |      |                |      |                |      |
| Ethics                  | 7              | 1.8  | 4              | 1.8  | 3              | 2.0  | 0              | 0.0  | 9              | 1.6  | 5              | 1.6  | 3              | 1.3  | 1              | 4.3  | 16             | 1.7  |
| EGOCENTRISM             |                |      |                |      |                |      |                |      |                |      |                |      |                |      |                |      |                |      |
| Egocentrism             | 3              | 0.8  | 2              | 0.9  | 1              | 0.7  | 0              | 0.0  | 2              | 0.3  | 2              | 0.6  | 0              | 0.0  | 0              | 0.0  | 5              | 0.5  |
| DON'T KNOW              |                |      |                |      |                |      |                |      |                |      |                |      |                |      |                |      |                |      |
| Don't know              | 36             | 9.2  | 17             | 7.5  | 18             | 12.2 | 1              | 6.7  | 27             | 4.7  | 8              | 2.5  | 17             | 7.3  | 2              | 8.7  | 63             | 6.5  |
| TOTAL                   | 390            | 100  | 228            | 100  | 147            | 100  | 15             | 100  | 575            | 100  | 319            | 100  | 233            | 100  | 23             | 100  | 965            | 100  |

## SUPPLEMENTARY MATERIAL - 2

## Tables S2. Frequency results considering the argument categories and school level

**Table S2-1.** Number (N<sub>a</sub>) and percentage (%) of the main argument categories and subcategories used by pupils in SCENARIO 1 for schemes A and B, according to SCHOOL LEVEL (MS: Middle School; HS: High School). The categories are presented in descending order of frequency observed for the three scenarios, with the Don't Know category presented last. (Satisfact. human interest: Satisfaction of human interest).

| CATEGORY<br>Subcategory   | Scheme A       |      |                |      |                |      | Scheme B       |      |                |      |                |      | TOTAL          |      |
|---------------------------|----------------|------|----------------|------|----------------|------|----------------|------|----------------|------|----------------|------|----------------|------|
|                           | All            |      | MS             |      | HS             |      | All            |      | MS             |      | HS             |      |                |      |
|                           | N <sub>a</sub> | %    |
| DIVERSITY                 |                |      |                |      |                |      |                |      |                |      |                |      |                |      |
| Abundance                 | 53             | 5.9  | 36             | 6.9  | 17             | 4.4  | 59             | 33.5 | 41             | 36.6 | 18             | 28.1 | 112            | 10.4 |
| Diversity value           | 167            | 18.5 | 90             | 17.3 | 77             | 20.1 | 11             | 6.3  | 10             | 8.9  | 1              | 1.6  | 178            | 16.5 |
| Evenness                  | 408            | 45.2 | 214            | 41.2 | 194            | 50.5 | 6              | 3.4  | 2              | 1.8  | 4              | 6.3  | 414            | 38.4 |
| Richness                  | 37             | 4.1  | 31             | 6.0  | 6              | 1.6  | 10             | 5.7  | 9              | 8.0  | 1              | 1.6  | 47             | 4.4  |
| ECOLOGICAL DYNAMICS       |                |      |                |      |                |      |                |      |                |      |                |      |                |      |
| Reproduction capacity     | 18             | 2.0  | 11             | 2.1  | 7              | 1.8  | 2              | 1.1  | 1              | 0.9  | 1              | 1.6  | 20             | 1.9  |
| Trophic structure         | 15             | 1.7  | 2              | 0.4  | 13             | 3.4  | 20             | 11.4 | 4              | 3.6  | 16             | 25.0 | 35             | 3.2  |
| Spatial interaction       | 14             | 1.6  | 8              | 1.5  | 6              | 1.6  | 1              | 0.6  | 1              | 0.9  | 0              | 0.0  | 15             | 1.4  |
| Naturalness               | 9              | 1.0  | 4              | 0.8  | 5              | 1.3  | 6              | 3.4  | 1              | 0.9  | 5              | 7.8  | 15             | 1.4  |
| Interspecific interaction | 18             | 2.0  | 12             | 2.3  | 6              | 1.5  | 4              | 2.3  | 3              | 2.7  | 1              | 1.6  | 22             | 2.1  |
| CONSERVATION              |                |      |                |      |                |      |                |      |                |      |                |      |                |      |
| General conservation      | 9              | 1.0  | 6              | 1.2  | 3              | 0.8  | 2              | 1.1  | 1              | 0.9  | 1              | 1.6  | 11             | 1.0  |
| Extinction risk           | 41             | 4.5  | 23             | 4.4  | 18             | 4.7  | 4              | 2.3  | 1              | 0.9  | 3              | 4.7  | 45             | 4.2  |
| AUTHORITARIANISM          |                |      |                |      |                |      |                |      |                |      |                |      |                |      |
| Authoritarianism          | 26             | 2.9  | 16             | 3.1  | 10             | 2.6  | 17             | 9.7  | 16             | 14.3 | 1              | 1.6  | 43             | 4.0  |
| EVOLUTION                 |                |      |                |      |                |      |                |      |                |      |                |      |                |      |
| Speciation                | 5              | 0.6  | 3              | 0.6  | 2              | 0.5  | 1              | 0.6  | 1              | 0.9  | 0              | 0.0  | 6              | 0.6  |
| AESTHETICS                |                |      |                |      |                |      |                |      |                |      |                |      |                |      |
| Aesthetics                | 25             | 2.8  | 16             | 3.1  | 9              | 2.3  | 6              | 3.4  | 6              | 5.4  | 0              | 0.0  | 31             | 2.9  |
| SOCIAL DYNAMICS           |                |      |                |      |                |      |                |      |                |      |                |      |                |      |
| Satisfact. human interest | 5              | 0.6  | 3              | 0.6  | 2              | 0.5  | 8              | 4.5  | 4              | 3.6  | 4              | 6.3  | 13             | 1.2  |
| ETHICS                    |                |      |                |      |                |      |                |      |                |      |                |      |                |      |
| Ethics                    | 12             | 1.3  | 11             | 2.1  | 1              | 0.3  | 0              | 0.0  | 0              | 0.0  | 0              | 0.0  | 12             | 1.1  |
| EGOCENTRISM               |                |      |                |      |                |      |                |      |                |      |                |      |                |      |
| Egocentrism               | 6              | 0.7  | 6              | 1.2  | 0              | 0.0  | 3              | 1.7  | 3              | 2.7  | 0              | 0.0  | 9              | 0.8  |
| DON'T KNOW                |                |      |                |      |                |      |                |      |                |      |                |      |                |      |
| Don't know                | 35             | 3.9  | 27             | 5.2  | 8              | 2.1  | 16             | 9.1  | 8              | 7.1  | 8              | 12.5 | 51             | 4.7  |
| TOTAL                     | 903            | 100  | 519            | 100  | 384            | 100  | 176            | 100  | 112            | 100  | 64             | 100  | 1079           | 100  |

**Table S2-2.** Number (N<sub>a</sub>) and percentage (%) of the main categories and subcategories of arguments used by pupils in SCENARIO 2 for schemes D and E, according to SCHOOL LEVEL (MS: Middle School; HS: High School). The categories are presented in descending order of frequency observed for the three scenarios, with the DK (Don't Know) category presented last. (Species introd. threats: Species introduction' threats; Sat. human int.: Satisfaction of human interest).

| CATEGORY<br>Subcategory   | Scheme C       |      |                |      |                |      | Scheme D       |      |                |      |                |      | TOTAL          |      |
|---------------------------|----------------|------|----------------|------|----------------|------|----------------|------|----------------|------|----------------|------|----------------|------|
|                           | All            |      | MS             |      | HS             |      | All            |      | MS             |      | HS             |      |                |      |
|                           | N <sub>a</sub> | %    |
| DIVERSITY                 |                |      |                |      |                |      |                |      |                |      |                |      |                |      |
| Abundance                 | 17             | 2.4  | 13             | 3.3  | 4              | 1.3  | 22             | 11.9 | 9              | 8.2  | 13             | 17.3 | 39             | 4.4  |
| Diversity value           | 201            | 28.9 | 77             | 19.4 | 124            | 41.3 | 13             | 7.0  | 8              | 7.3  | 5              | 6.7  | 214            | 24.3 |
| Evenness                  | 43             | 6.2  | 20             | 5.1  | 23             | 7.7  | 38             | 20.5 | 27             | 24.5 | 11             | 14.7 | 81             | 9.2  |
| Richness                  | 291            | 41.8 | 192            | 48.5 | 99             | 33.0 | 20             | 10.8 | 11             | 10.0 | 9              | 12.0 | 311            | 35.3 |
| ECOLOGICAL DYNAMICS       |                |      |                |      |                |      |                |      |                |      |                |      |                |      |
| Reproduction capacity     | 6              | 0.9  | 2              | 0.5  | 4              | 1.3  | 5              | 2.7  | 2              | 1.8  | 3              | 4.0  | 11             | 1.2  |
| Trophic structure         | 7              | 1.0  | 3              | 0.8  | 4              | 1.3  | 3              | 1.6  | 0              | 0.0  | 3              | 4.0  | 10             | 1.1  |
| Spatial interaction       | 2              | 0.3  | 1              | 0.3  | 1              | 0.3  | 3              | 1.6  | 2              | 1.8  | 1              | 1.3  | 5              | 0.6  |
| Naturalness               | 7              | 1.0  | 4              | 1.0  | 3              | 1.0  | 4              | 2.2  | 3              | 2.7  | 1              | 1.3  | 11             | 1.2  |
| Interspecific interaction | 3              | 0.4  | 0              | 0.0  | 3              | 1.0  | 3              | 1.6  | 2              | 1.8  | 1              | 1.3  | 6              | 0.7  |
| CONSERVATION              |                |      |                |      |                |      |                |      |                |      |                |      |                |      |
| General conservation      | 3              | 0.4  | 2              | 0.5  | 1              | 0.3  | 0              | 0.0  | 0              | 0.0  | 0              | 0.0  | 3              | 0.3  |
| Species introd. threats   | 0              | 0.0  | 0              | 0.0  | 0              | 0.0  | 2              | 1.1  | 0              | 0.0  | 2              | 2.7  | 2              | 0.2  |
| Extinction risk           | 12             | 1.7  | 8              | 2.0  | 4              | 1.3  | 7              | 3.8  | 3              | 2.7  | 4              | 5.3  | 19             | 2.2  |
| AUTHORITARIANISM          |                |      |                |      |                |      |                |      |                |      |                |      |                |      |
| Authoritarianism          | 28             | 4.0  | 21             | 5.3  | 7              | 2.3  | 23             | 12.4 | 16             | 14.5 | 7              | 9.3  | 51             | 5.8  |
| EVOLUTION                 |                |      |                |      |                |      |                |      |                |      |                |      |                |      |
| Speciation                | 9              | 1.3  | 5              | 1.3  | 4              | 1.3  | 4              | 2.2  | 2              | 1.8  | 2              | 2.6  | 13             | 1.5  |
| AESTHETICS                |                |      |                |      |                |      |                |      |                |      |                |      |                |      |
| Aesthetics                | 15             | 2.2  | 14             | 3.5  | 1              | 0.3  | 13             | 7.0  | 8              | 7.3  | 5              | 6.7  | 28             | 3.2  |
| SOCIAL DYNAMICS           |                |      |                |      |                |      |                |      |                |      |                |      |                |      |
| Sat. human interest       | 8              | 1.1  | 3              | 0.8  | 5              | 1.7  | 2              | 1.1  | 1              | 0.9  | 1              | 1.3  | 10             | 1.1  |
| ETHICS                    |                |      |                |      |                |      |                |      |                |      |                |      |                |      |
| Ethics                    | 2              | 0.3  | 1              | 0.3  | 1              | 0.3  | 1              | 0.5  | 1              | 0.9  | 0              | 0.0  | 3              | 0.3  |
| EGOCENTRISM               |                |      |                |      |                |      |                |      |                |      |                |      |                |      |
| Egocentrism               | 7              | 1.0  | 4              | 1.0  | 3              | 1.0  | 1              | 0.5  | 1              | 0.9  | 0              | 0.0  | 8              | 0.9  |
| DON'T KNOW                |                |      |                |      |                |      |                |      |                |      |                |      |                |      |
| Don't know                | 35             | 5.0  | 26             | 6.6  | 9              | 3.0  | 21             | 11.4 | 14             | 12.7 | 7              | 9.3  | 56             | 6.4  |
| TOTAL                     | 696            | 100  | 396            | 100  | 300            | 100  | 185            | 100  | 110            | 100  | 75             | 100  | 881            | 100  |

**Table S2-3.** Number (N<sub>a</sub>) and percentage (%) of the main categories and subcategories of arguments used by pupils in SCENARIO 3 for schemes E and F, according to SCHOOL LEVEL (MS: Middle School; HS: High School). The categories are presented in descending order of frequency observed for the three scenarios, with the DK (Don't Know) category presented last. (Colonization mode–A: Artificial colonization mode; Colonization mode–N: Natural colonization mode; Species introd. threats: Species introduction' threats; Adaptation–Orig.: Adaption in original habitat; Adaptation–New: Adaptation to a new habitat; Sat. human int.: Satisfaction of human interest).

| CATEGORY<br>Subcategory   | Scheme E       |      |                |      |                |      | Scheme F       |      |                |      |                |      | TOTAL          |      |
|---------------------------|----------------|------|----------------|------|----------------|------|----------------|------|----------------|------|----------------|------|----------------|------|
|                           | All            |      | MS             |      | HS             |      | All            |      | MS             |      | HS             |      |                |      |
|                           | N <sub>a</sub> | %    |
| DIVERSITY                 |                |      |                |      |                |      |                |      |                |      |                |      |                |      |
| Abundance                 | 7              | 1.8  | 4              | 1.5  | 3              | 2.5  | 13             | 2.3  | 8              | 3.0  | 5              | 1.6  | 20             | 2.1  |
| Diversity value           | 68             | 17.4 | 35             | 13.0 | 33             | 27.3 | 14             | 2.4  | 6              | 2.2  | 8              | 2.6  | 82             | 8.5  |
| Evenness                  | 14             | 3.6  | 9              | 3.3  | 5              | 4.1  | 22             | 3.8  | 10             | 3.7  | 12             | 3.9  | 36             | 3.7  |
| Richness                  | 148            | 37.9 | 111            | 41.3 | 37             | 30.6 | 30             | 5.2  | 25             | 9.4  | 5              | 1.6  | 178            | 18.4 |
| ECOLOGICAL DYNAMICS       |                |      |                |      |                |      |                |      |                |      |                |      |                |      |
| Reproduction capacity     | 1              | 0.3  | 0              | 0.0  | 1              | 0.8  | 6              | 1.1  | 4              | 1.5  | 0              | 0.0  | 7              | 0.7  |
| Colonization mode–A       | 25             | 6.4  | 18             | 6.7  | 7              | 5.8  | 29             | 5.1  | 7              | 2.6  | 22             | 7.1  | 54             | 5.6  |
| Colonization mode–N       | 7              | 1.8  | 4              | 1.5  | 3              | 2.5  | 116            | 20.2 | 58             | 21.7 | 58             | 18.8 | 123            | 12.7 |
| Trophic structure         | 3              | 0.8  | 1              | 0.4  | 2              | 1.7  | 5              | 0.9  | 0              | 0.0  | 5              | 1.6  | 8              | 0.8  |
| Spatial interaction       | 1              | 0.3  | 1              | 0.4  | 0              | 0.0  | 5              | 0.9  | 5              | 1.9  | 0              | 0.0  | 6              | 0.6  |
| Naturalness               | 0              | 0.0  | 0              | 0.0  | 0              | 0.0  | 58             | 10.1 | 26             | 9.7  | 32             | 10.4 | 58             | 6.0  |
| Interspecific interaction | 0              | 0.0  | 0              | 0.0  | 0              | 0.0  | 9              | 1.6  | 2              | 0.7  | 7              | 2.3  | 9              | 0.9  |
| CONSERVATION              |                |      |                |      |                |      |                |      |                |      |                |      |                |      |
| General conservation      | 2              | 0.5  | 1              | 0.4  | 1              | 0.8  | 12             | 2.1  | 3              | 1.1  | 9              | 2.9  | 14             | 1.5  |
| Ethnocentrism             | 2              | 0.5  | 1              | 0.4  | 1              | 0.8  | 32             | 5.6  | 16             | 6.0  | 16             | 5.2  | 34             | 3.5  |
| Species introd. threats   | 3              | 0.8  | 2              | 0.7  | 1              | 0.8  | 68             | 11.8 | 18             | 6.7  | 50             | 16.2 | 71             | 7.4  |
| Extinction risk           | 6              | 1.5  | 5              | 1.9  | 1              | 0.8  | 17             | 3.0  | 2              | 0.7  | 15             | 4.9  | 23             | 2.4  |
| AUTHORITARIANISM          |                |      |                |      |                |      |                |      |                |      |                |      |                |      |
| Authoritarianism          | 24             | 6.2  | 19             | 7.1  | 5              | 4.1  | 26             | 4.5  | 19             | 7.1  | 7              | 2.3  | 50             | 5.2  |
| EVOLUTION                 |                |      |                |      |                |      |                |      |                |      |                |      |                |      |
| Adaptation–Orig.          | 0              | 0.0  | 0              | 0.0  | 0              | 0.0  | 29             | 5.0  | 13             | 4.9  | 16             | 5.2  | 29             | 3.0  |
| Adaptation–New            | 4              | 1.0  | 2              | 0.7  | 2              | 1.7  | 22             | 3.8  | 9              | 3.4  | 13             | 4.2  | 26             | 2.7  |
| Speciation                | 3              | 0.8  | 2              | 0.7  | 1              | 0.8  | 8              | 1.4  | 3              | 1.1  | 5              | 1.6  | 11             | 1.1  |
| AESTHETICS                |                |      |                |      |                |      |                |      |                |      |                |      |                |      |
| Aesthetics                | 13             | 3.3  | 11             | 4.1  | 2              | 1.7  | 9              | 1.6  | 6              | 2.2  | 3              | 1.0  | 22             | 2.3  |
| SOCIAL DYNAMICS           |                |      |                |      |                |      |                |      |                |      |                |      |                |      |
| Sat. human interest       | 13             | 3.3  | 9              | 3.3  | 4              | 3.3  | 7              | 1.2  | 4              | 1.5  | 3              | 1.0  | 20             | 2.1  |
| ETHICS                    |                |      |                |      |                |      |                |      |                |      |                |      |                |      |
| Ethics                    | 7              | 1.8  | 3              | 1.1  | 4              | 3.3  | 9              | 1.6  | 3              | 1.1  | 6              | 1.9  | 16             | 1.7  |
| EGOCENTRISM               |                |      |                |      |                |      |                |      |                |      |                |      |                |      |
| Egocentrism               | 3              | 0.8  | 2              | 0.7  | 1              | 0.8  | 2              | 0.3  | 2              | 0.7  | 0              | 0.0  | 5              | 0.5  |
| DON'T KNOW                |                |      |                |      |                |      |                |      |                |      |                |      |                |      |
| Don't know                | 36             | 9.2  | 29             | 10.8 | 7              | 5.8  | 27             | 4.7  | 18             | 6.7  | 9              | 2.9  | 63             | 6.5  |
| TOTAL                     | 390            | 100  | 269            | 100  | 121            | 100  | 575            | 100  | 267            | 100  | 308            | 100  | 965            | 100  |
